# Supplementary material for: Synthesis of Arylene Ether-Type Hyperbranched Poly(triphenylamine) for Lithium Battery Cathodes
Source: MDPI journal article supplement (doi:10.3390/ma14247885), 2021-12-20
Supplement: s1 [file s1]

## Supporting Information

# Synthesis of Arylene Ether-Type Hyperbranched Poly (Triphenylamine) for Lithium Battery Cathodes

Inah Kang <sup>1,†</sup>, Taewoong Lee <sup>2,†</sup>, Young Rok Yoon <sup>1</sup>, Jee Woo Kim <sup>3</sup>, Byung-Kwon Kim <sup>3</sup>,

Jinhee Lee <sup>1,4,\*</sup>, Jin Hong Lee <sup>2,\*</sup>, Sang Youl Kim <sup>1,\*</sup>

<sup>1</sup> *Department of Chemistry, Korea Advanced Institute of Science and Technology (KAIST), Daejeon 34141, Korea*

<sup>2</sup> *School of Chemical Engineering, Pusan National University, Busan 46421, Korea*

<sup>3</sup> *Department of Chemistry and Nanoscience, Ewha Womans University, 52, Seoul, 03760, Korea*

<sup>4</sup> *Reliability Assessment Center for Chemical Materials, Korea Research Institute of Chemical Technology (KRICT), Daejeon 34114, Korea*

<sup>†</sup> Inah Kang and Taewoong Lee contributed equally to this work.

**a**

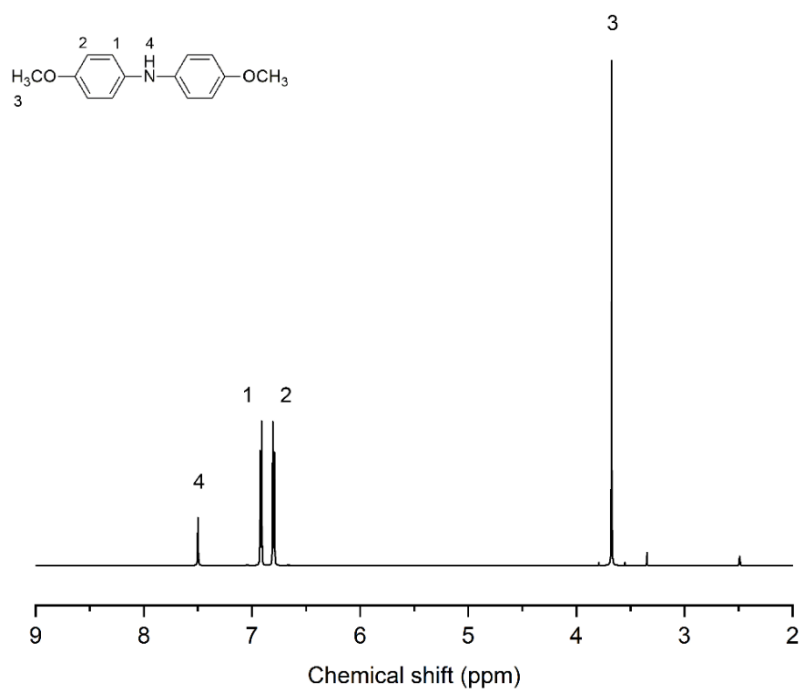

**b**

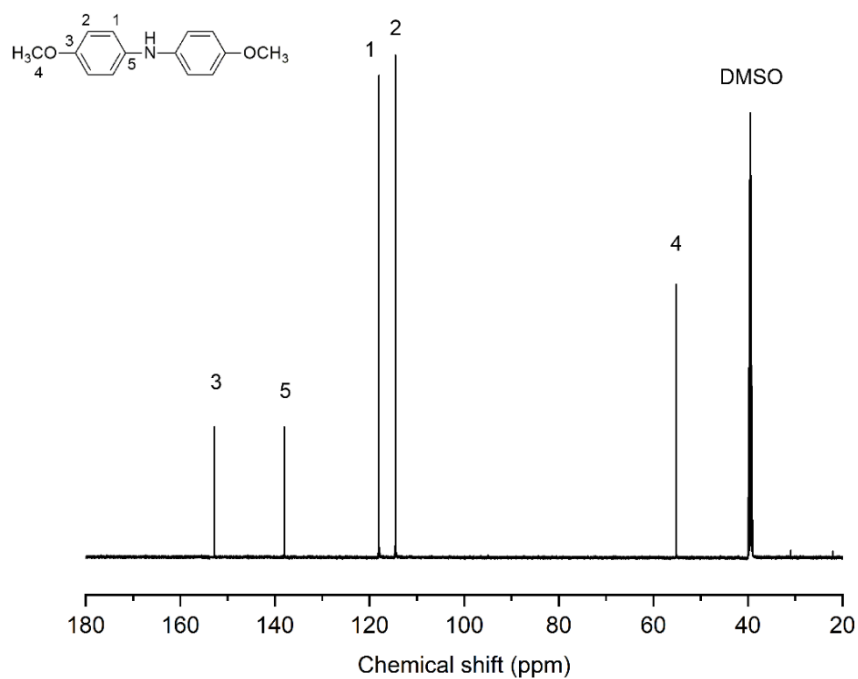

**Figure S1.** (a) <sup>1</sup>H NMR spectra of 1 (DMSO-*d*<sub>6</sub>, 600 MHz). (b) <sup>13</sup>C NMR spectra of 1 (DMSO-*d*<sub>6</sub>, 150 MHz).

**a**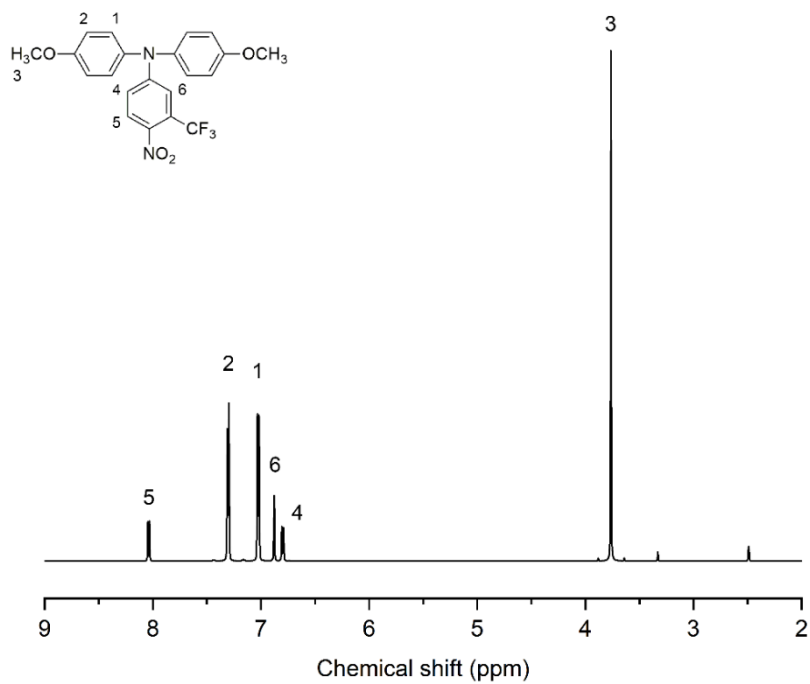**b**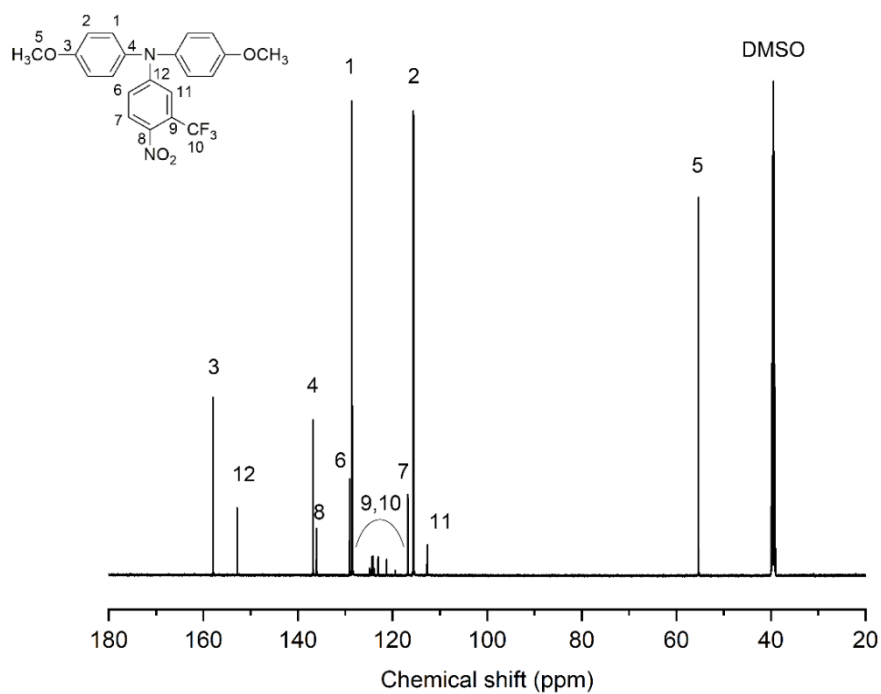

**Figure S2.** (a) <sup>1</sup>H NMR spectra of 2 (DMSO-*d*<sub>6</sub>, 600 MHz). (b) <sup>13</sup>C NMR spectra of 2 (DMSO-*d*<sub>6</sub>, 150 MHz).

**a**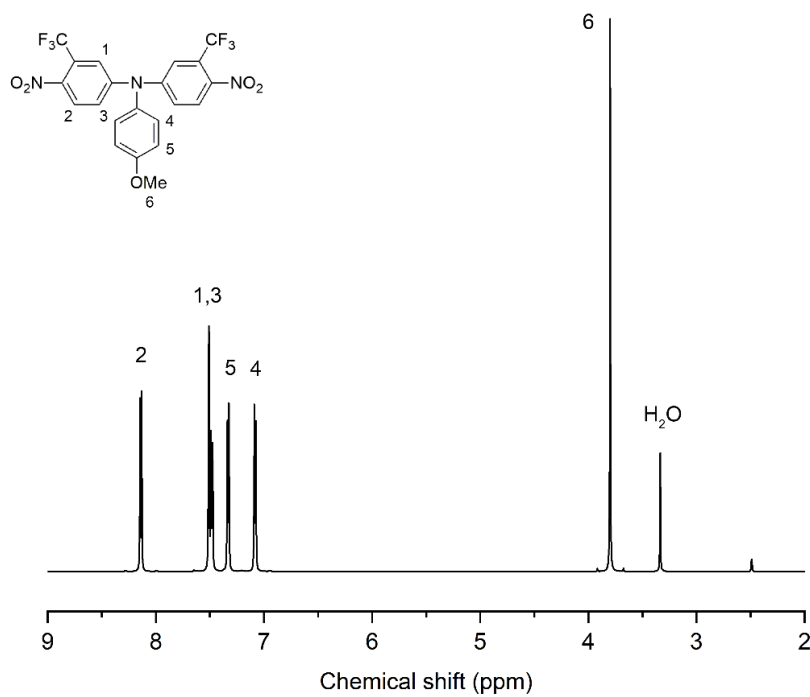**b**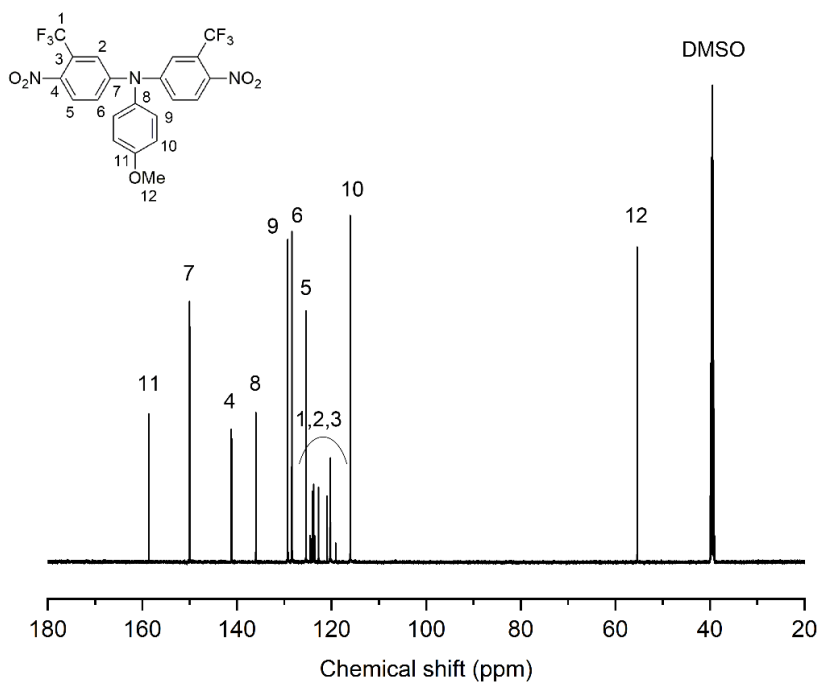

**Figure S3.** (a)  $^1\text{H}$  NMR spectra of **3** (DMSO- $d_6$ , 600 MHz). (b)  $^{13}\text{C}$  NMR spectra of **3** (DMSO- $d_6$ , 150 MHz).

**a**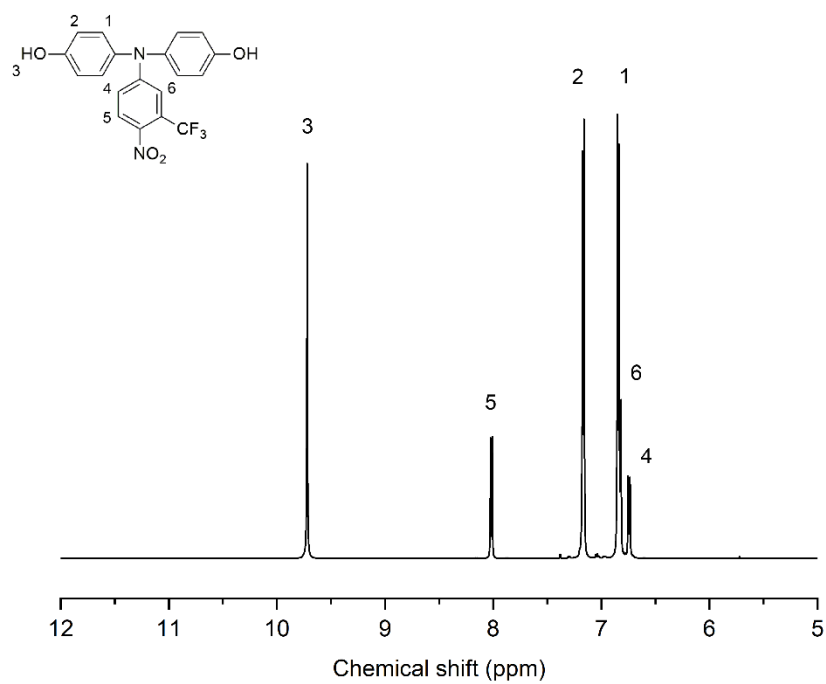**b**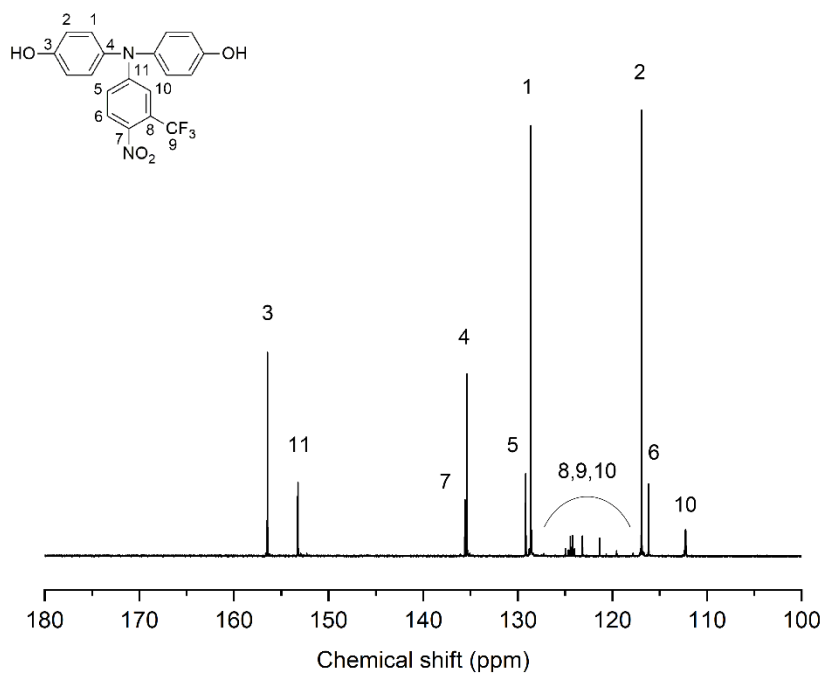

**Figure S4.** (a)  $^1\text{H}$  NMR spectra of 4 (DMSO- $d_6$ , 600 MHz). (b)  $^{13}\text{C}$  NMR spectra of 4 (DMSO- $d_6$ , 150 MHz).

**a**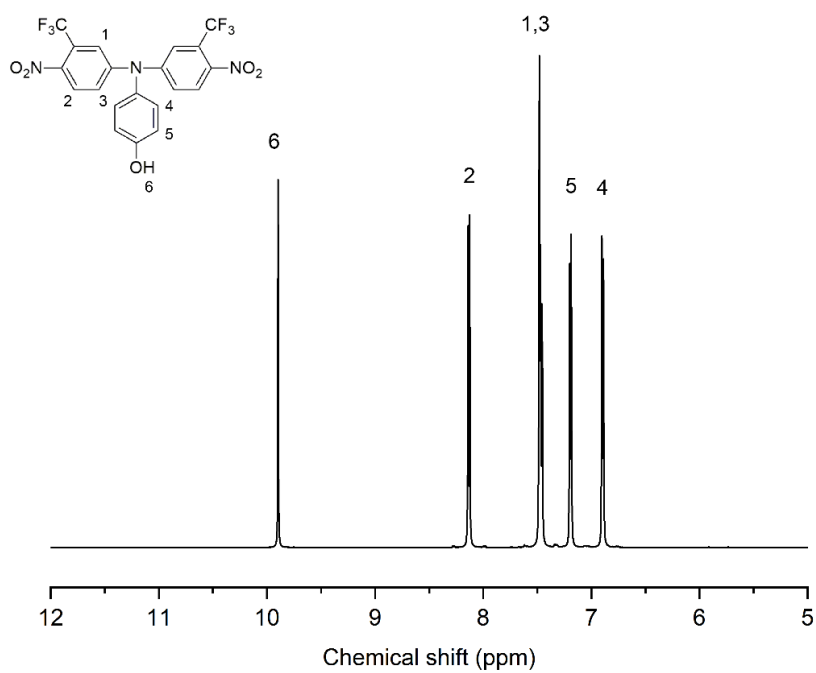**b**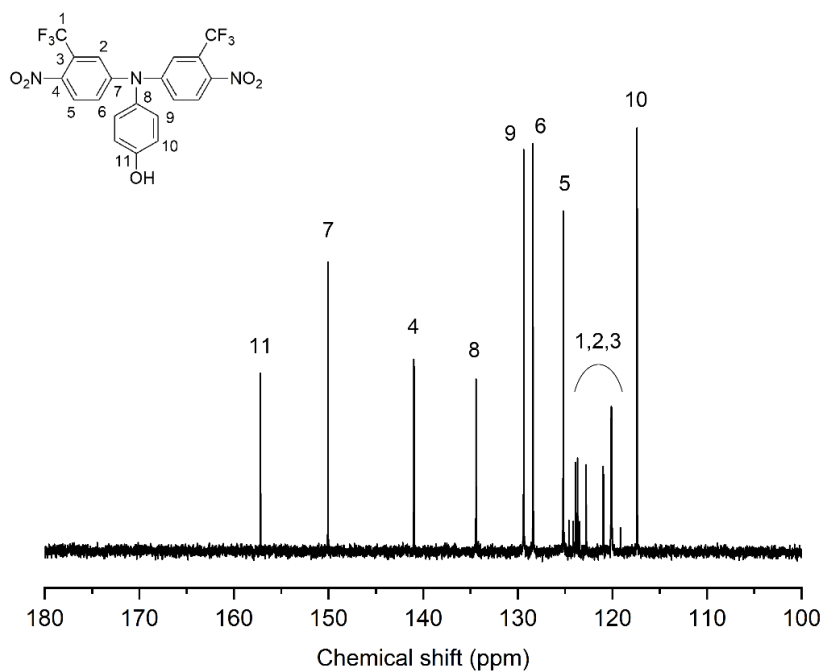

**Figure S5.** (a)  $^1\text{H}$  NMR spectra of 5 (DMSO- $d_6$ , 600 MHz). (b)  $^{13}\text{C}$  NMR spectra of 5 (DMSO- $d_6$ , 150 MHz).

**a**

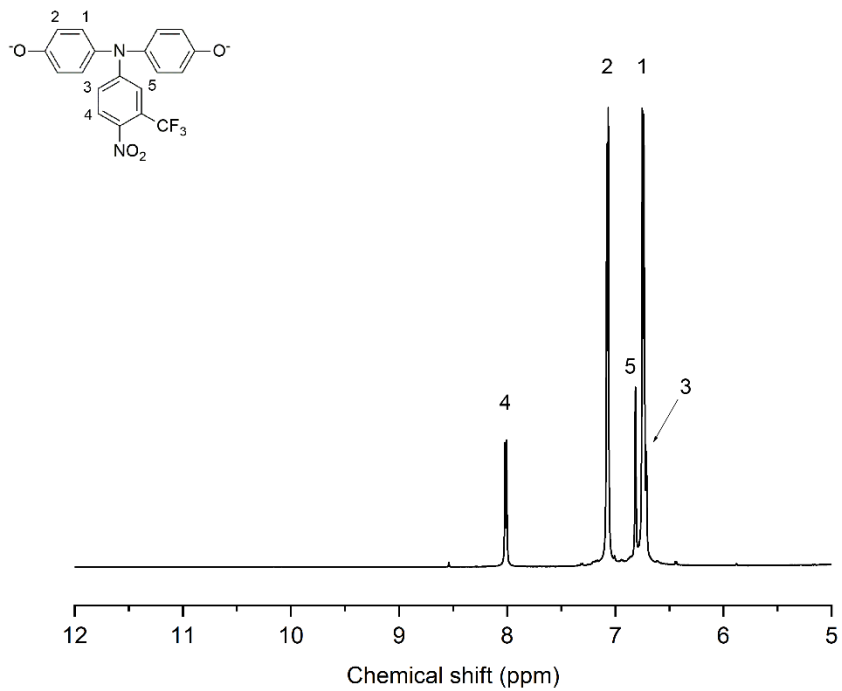**b**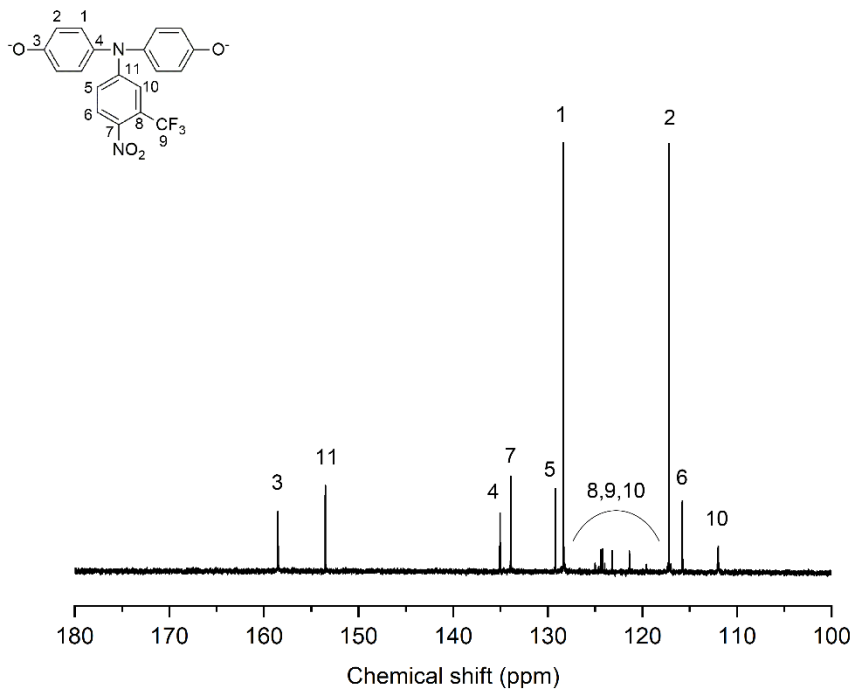

**Figure S6.** (a)  $^1\text{H}$  NMR spectra of 4-K (DMSO-*d*6, 600 MHz). (b)  $^{13}\text{C}$  NMR spectra of 4-K (DMSO-*d*6, 150 MHz).

**a**

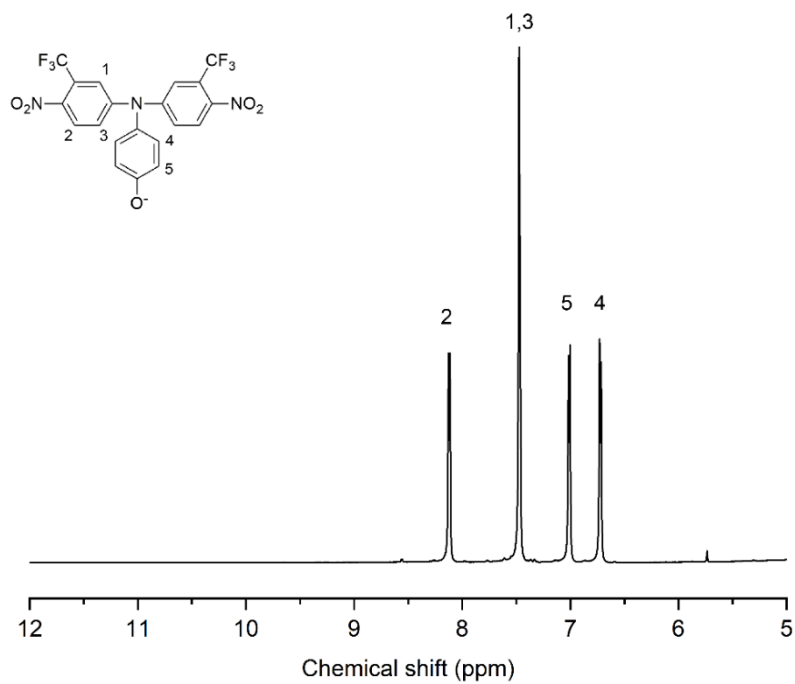

**b**

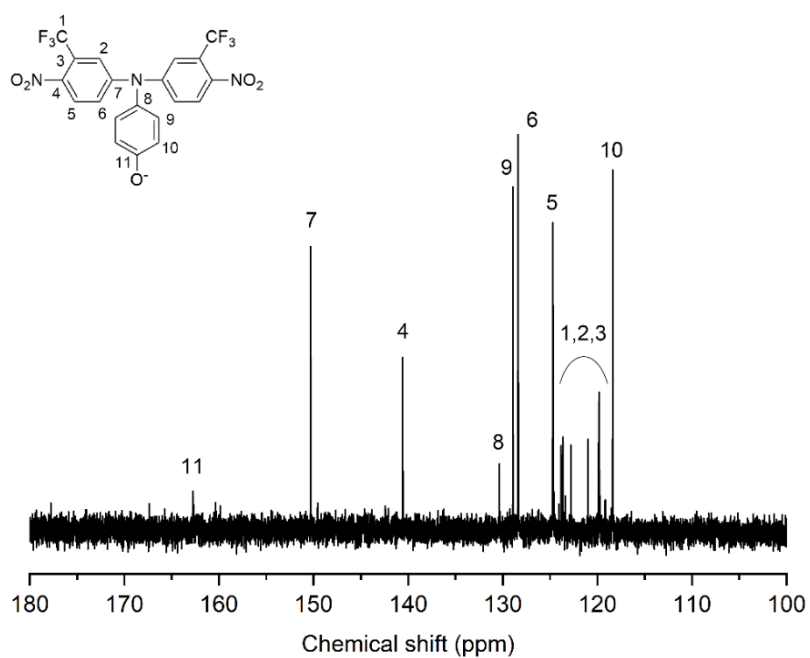

**Figure S7.** (a)  $^1\text{H}$  NMR spectra of 5-K (DMSO- $d_6$ , 600 MHz). (b)  $^{13}\text{C}$  NMR spectra of 5-K (DMSO- $d_6$ , 150 MHz).



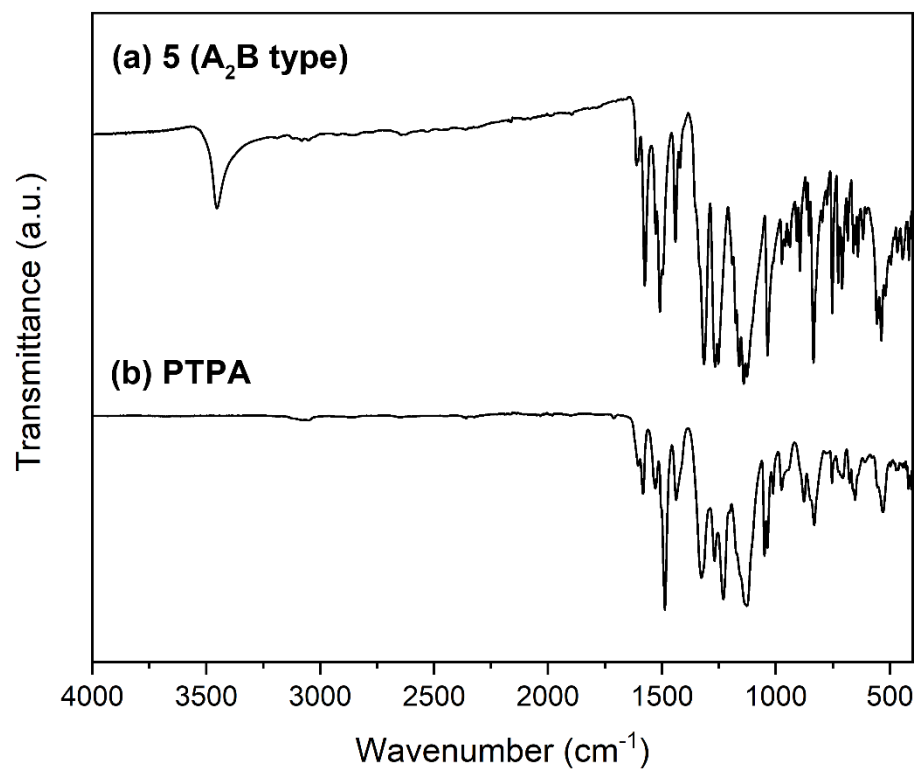

**Figure S8.** IR spectra of (a) 5 and (b) PTPA.

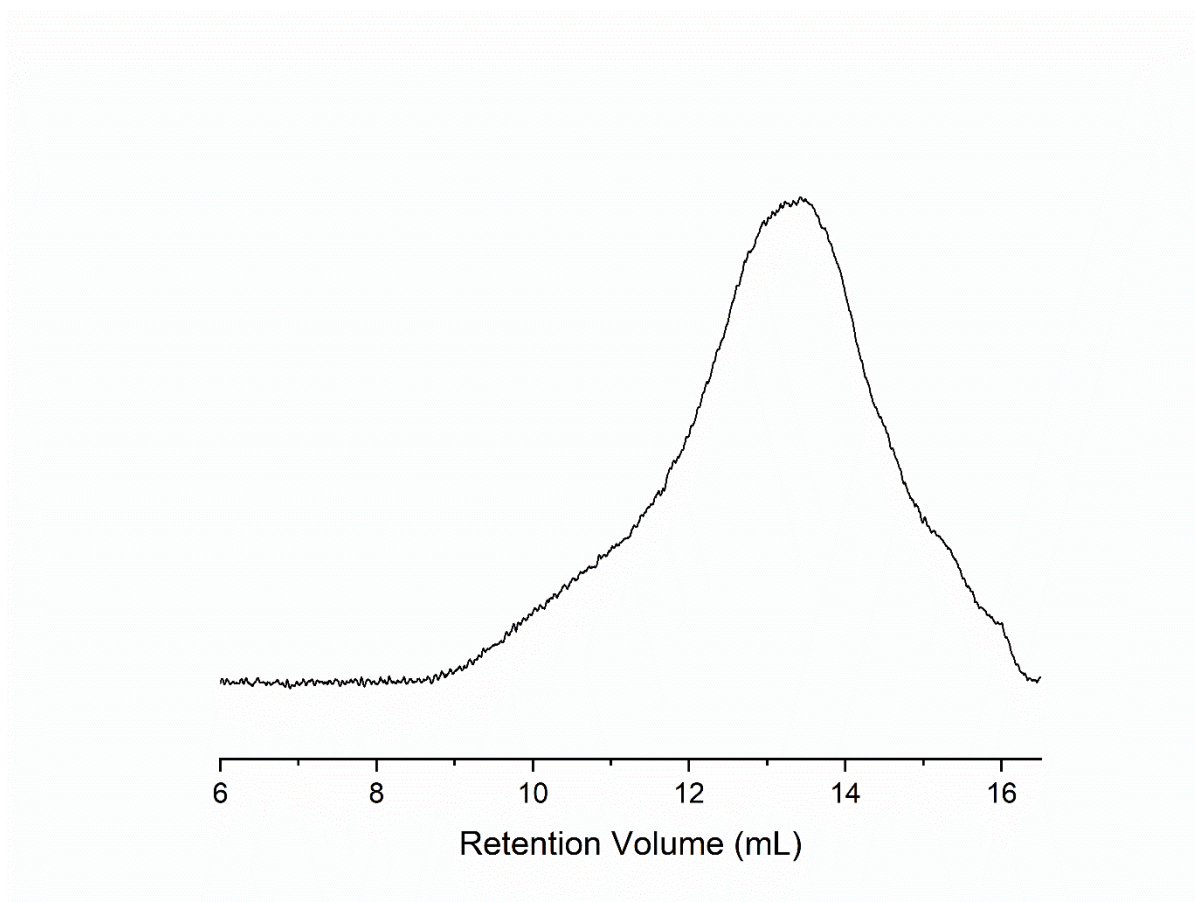

**Figure S9.** SEC traces of PTPA (THF, 36 °C, 0.6 mL/min). Estimated molecular weight was  $M_n = 22,200$  and  $M_w = 303,400$ .

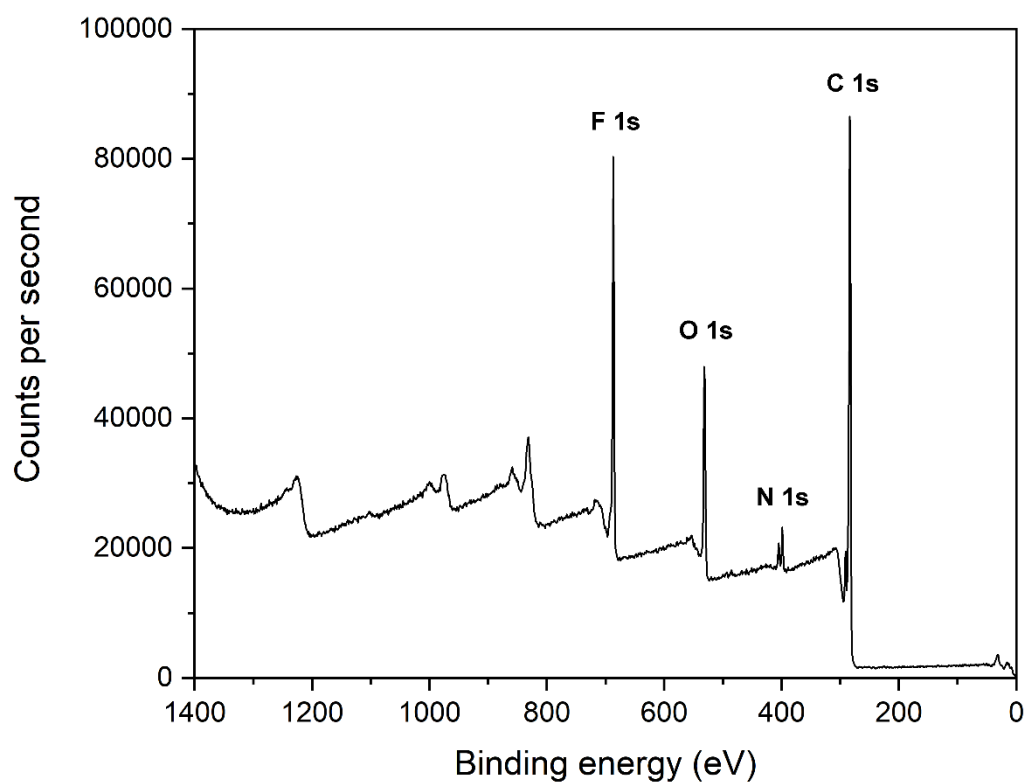

**Figure S10.** XPS spectrum of PTPA.

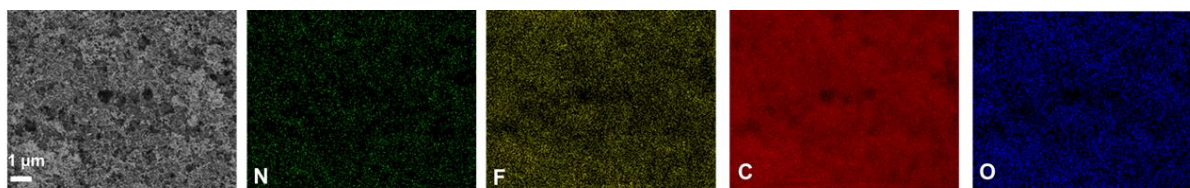

**Figure S11.** SEM images and element mapping images of PTPA cathode.
